# Supplementary material
Source: MDPI journal article supplement (https://www.mdpi.com/2071-1050/14/6/3233)
Supplement: s1 [file s1]

# Slow-pyrolysis of *Ulva lactuca* (Chlorophyta) for sustainable production of bio-oil and bio-char

Apip Amrullah <sup>1</sup>, Obie Farobie <sup>2,3\*</sup>, Asep Bayu <sup>4</sup>, Novi Syaftika <sup>5</sup>, Edy Hartulistiyoso <sup>2,3</sup>, Navid R. Moheimani <sup>6</sup>, Surachai Karnjanakom <sup>7</sup> and Yukihiko Matsumura <sup>8</sup>

<sup>1</sup> Department of Mechanical Engineering, Lambung Mangkurat University, Banjarmasin 70123, Indonesia; apip.amrullah@ulm.ac.id

<sup>2</sup> Department of Mechanical and Biosystem Engineering, Faculty of Agricultural Engineering and Technology, IPB University (Bogor Agricultural University), IPB Darmaga Campus, P.O. Box 220, Bogor 16002, Indonesia; edyhartulistiyoso@apps.ipb.ac.id (E.D.)

<sup>3</sup> Surfactant and Bioenergy Research Center (SBRC), IPB University (Bogor Agricultural University), Bogor 16144, Indonesia

<sup>4</sup> Research Center for Biotechnology, Research Organization for Life Sciences, National Research and Innovation Agency (BRIN), Jl. Raya Jakarta-Bogor KM 46 Cibinong, Bogor 16911, Indonesia; asepbayu@yahoo.co.id

<sup>5</sup> Center for Energy Resource and Chemical Industry Technology, Research Organization for Assessment and Application of Technology, National Research and Innovation Agency (BRIN), Kawasan Puspitek Serpong, Indonesia; novi017@brin.go.id

<sup>6</sup> Algae R&D Centre, Harry Butler Institute, Murdoch University, Murdoch, WA 6150, Australia; n.moheimani@murdoch.edu.au

<sup>7</sup> Department of Chemistry, Faculty of Science, Rangsit University, Pathumthani 12000, Thailand; surachai.ka@rsu.ac.th

<sup>8</sup> Graduate School of Advanced Science and Engineering, Hiroshima University, Higashi-Hiroshima 739-8527, Japan; mat@hiroshima-u.ac.jp

\* Correspondence: obiefarobie@apps.ipb.ac.id

**Table S1.** Proximate and ultimate analysis of *Ulva lactuca*.

| Proximate analysis (wt%) <sup>a</sup> |                 |                 |                    | Ultimate analysis (wt%) <sup>b</sup> |                |                |                |                  | HHV<br>(MJ/kg)  |
|---------------------------------------|-----------------|-----------------|--------------------|--------------------------------------|----------------|----------------|----------------|------------------|-----------------|
| Moisture                              | Ash<br>Content  | Fixed<br>Carbon | Volatile<br>Matter | % C                                  | % H            | % N            | % S            | % O <sup>c</sup> |                 |
| 7.18 ±<br>0.03                        | 42.06 ±<br>0.19 | 1.01 ±<br>0.01  | 49.75 ±<br>0.15    | 39.10 ±<br>0.05                      | 6.20 ±<br>0.05 | 4.46 ±<br>0.02 | 7.28 ±<br>0.03 | 42.96 ±<br>0.05  | 12.04 ±<br>0.03 |

<sup>a</sup> dry base.

<sup>a</sup> dry ash-free.

<sup>c</sup> calculated by difference, i.e., O = 100% – C – H – N – S.

**Table S2.** Typical band assignment of bio-char from slow-pyrolysis of *U. lactuca*.

| Main peak (cm <sup>-1</sup> ) |        |        | Typical band assignment |
|-------------------------------|--------|--------|-------------------------|
| 400 °C                        | 500 °C | 600 °C |                         |
| 3239                          | n/a    | n/a    | O–H stretching          |
| 1435                          | 1399   | 1423   | aliphatic C–H bending   |
| 1087                          | 1084   | 1088   | C–O bending             |
| 871                           | 871    | 872    | aromatic C–H stretching |

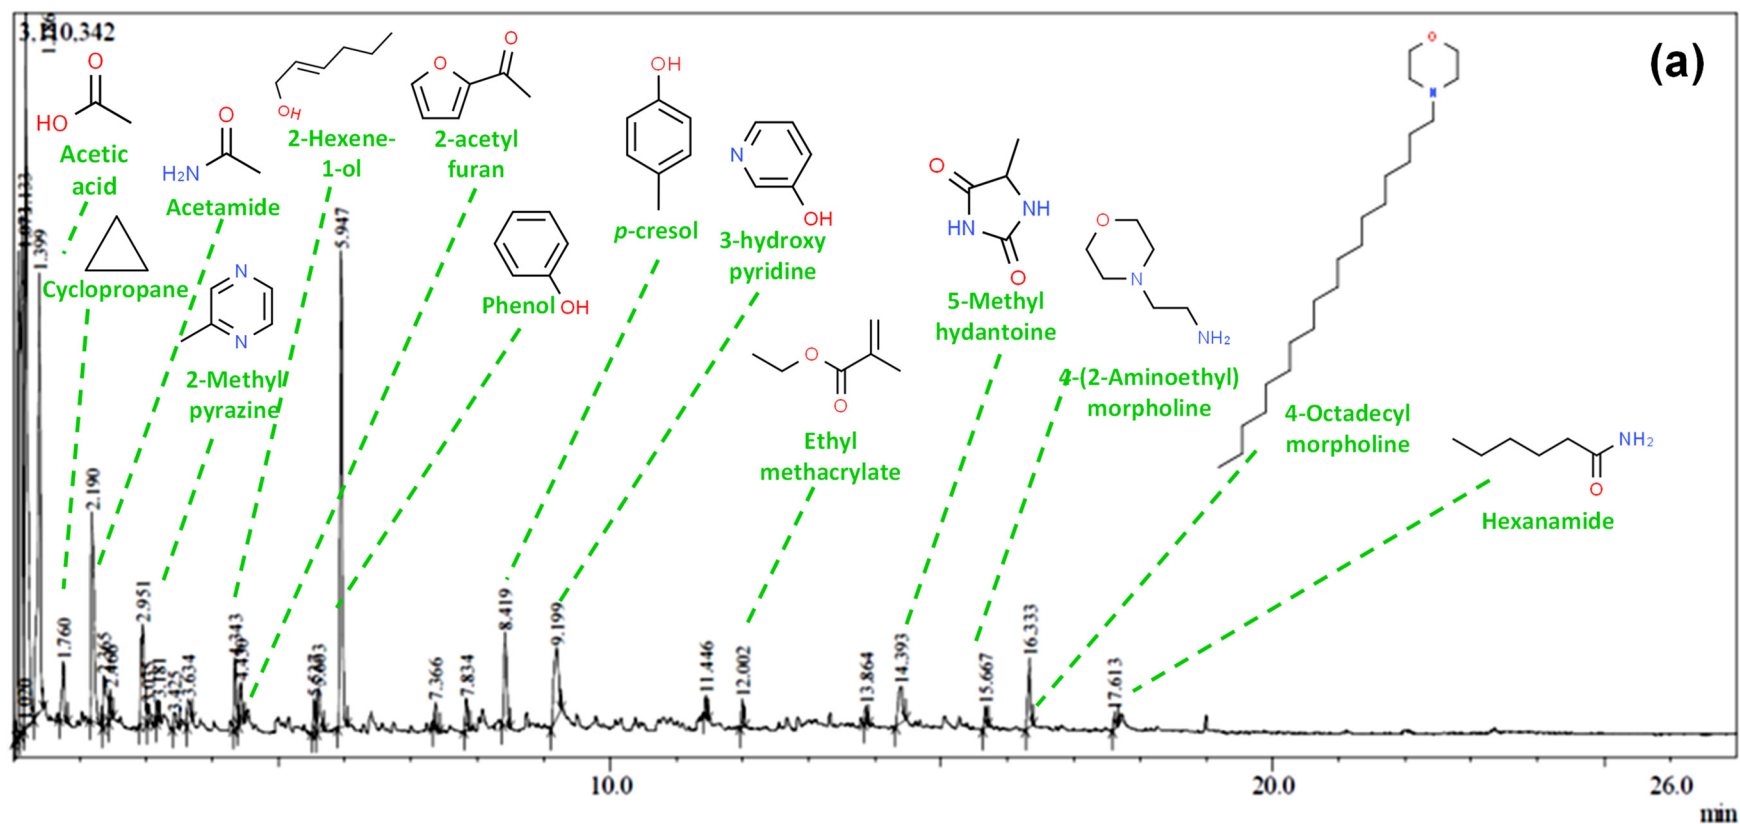

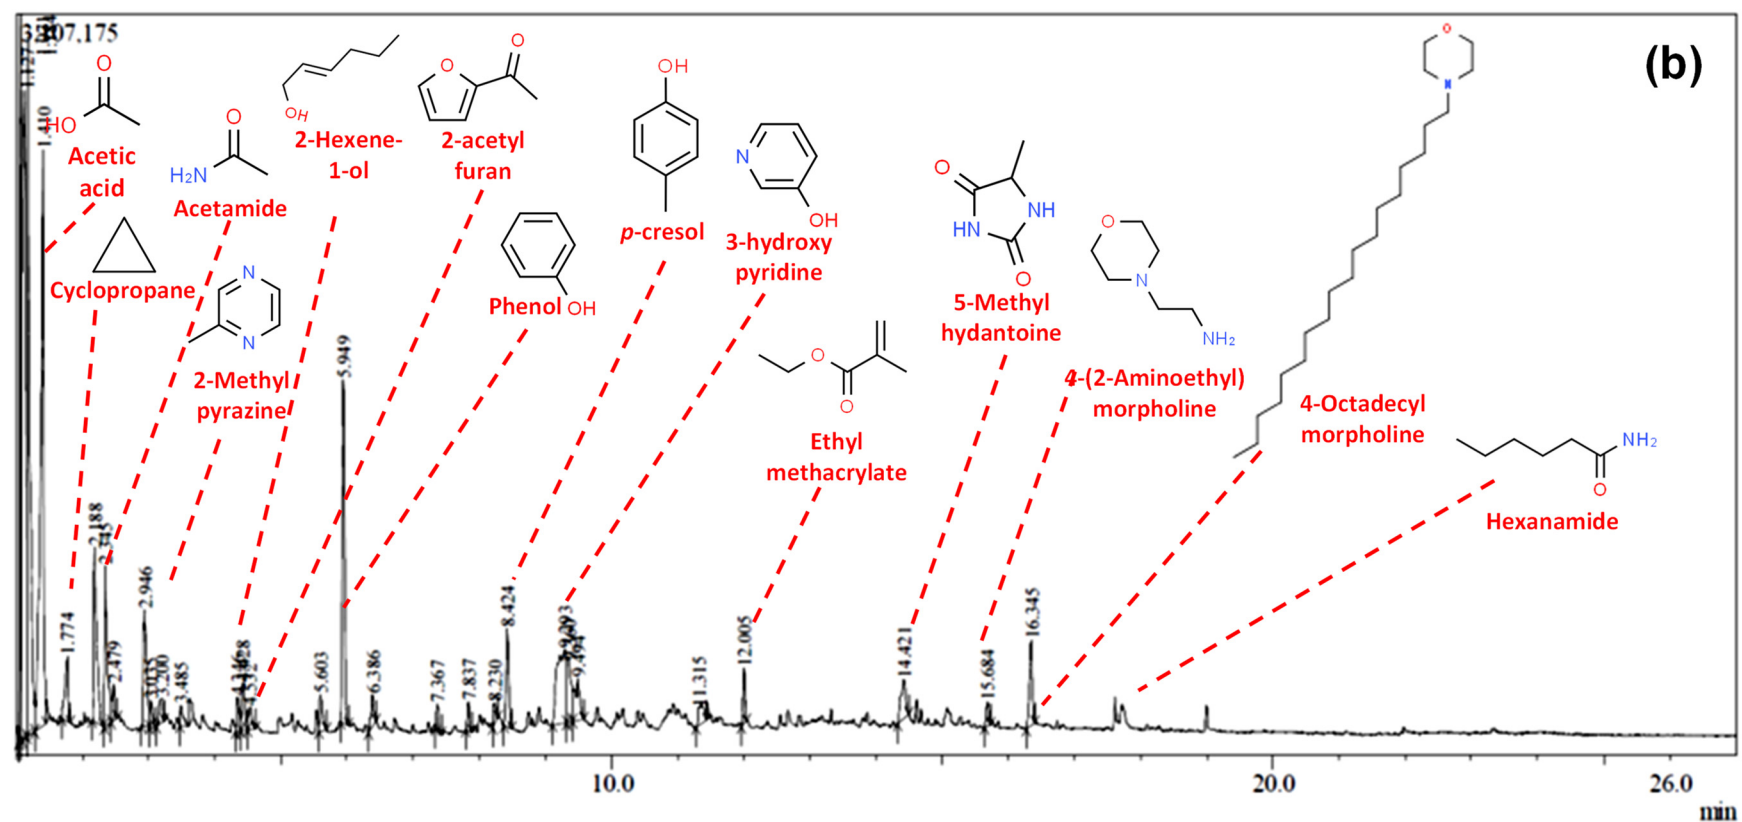

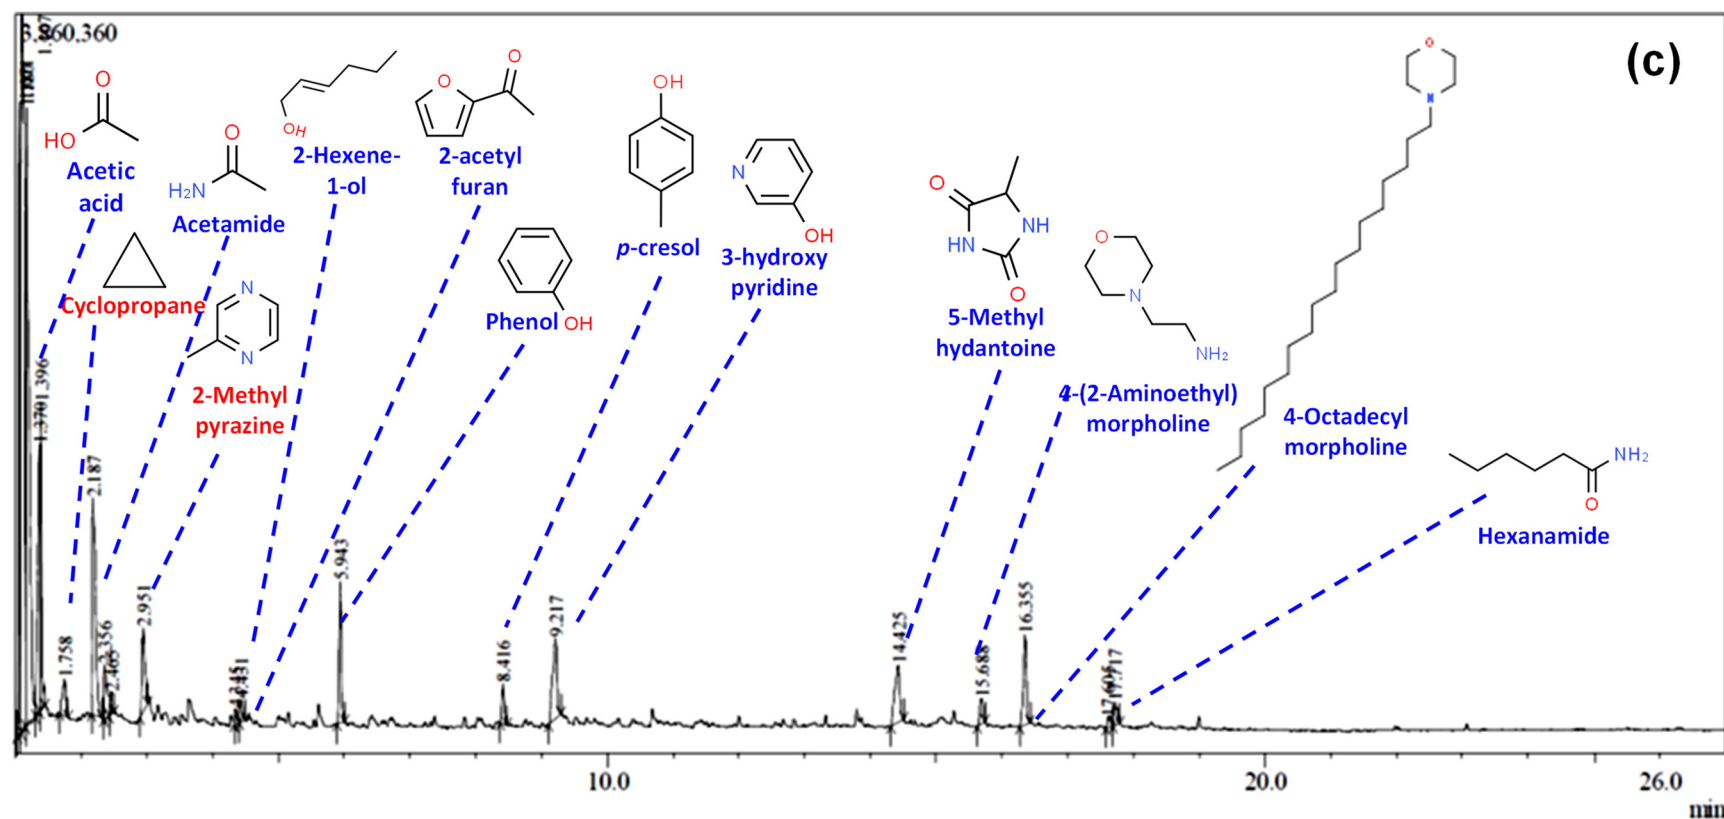

Figure S1. GC/MS chromatogram from pyrolysis of *U. lactuca* at (a) 400 °C, (b) 500 °C, and (c) 600 °C.
